# Supplementary material
Source: Springer Nature journal article supplement (https://www.springermedizin.de/resource/supplementary/12916_2013_868_MOESM1_ESM.pdf/9598518)

W4

W12

W24

W48

W72

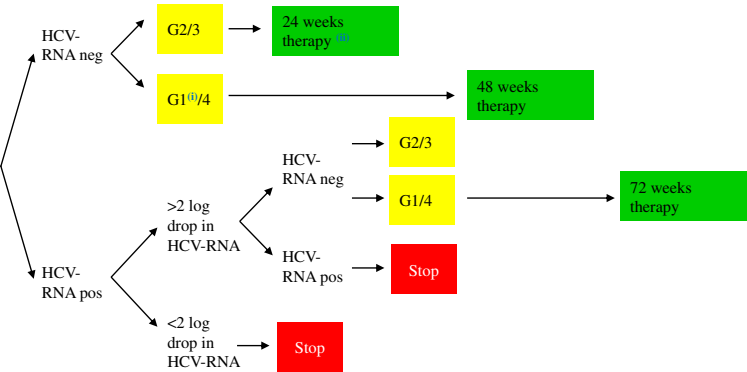

Supplement: MOESM1 [file 9598518]
